# Supplementary material for: Self-complementary hydrogen-bond interactions of guanosine: a hub for constructing supra-amphiphilic polymers with controlled molecular structure and aggregate morphology
Source: Royal Society of Chemistry journal article supplement (doi:10.1039/c8sm02172d), 2018-11-20
Supplement: c8sm02172d1.pdf [file c8sm02172d1.pdf]

## Supplementary Information

### Self-Complementary Hydrogen-Bond Interaction of Guanosine: a Hub for Constructing Supra-Amphiphilic Polymers with Controlled Molecular Structure and Aggregate Morphology

Qian Xiao, Fei Song,\* Wu-Cheng Nie, Xiu-Li Wang, Yu-Zhong Wang

Center for Degradable and Flame-Retardant Polymeric Materials, College of Chemistry, State Key Laboratory of Polymer Materials Engineering, National Engineering Laboratory of Eco-Friendly Polymeric Materials (Sichuan), Sichuan University, Chengdu 610064.

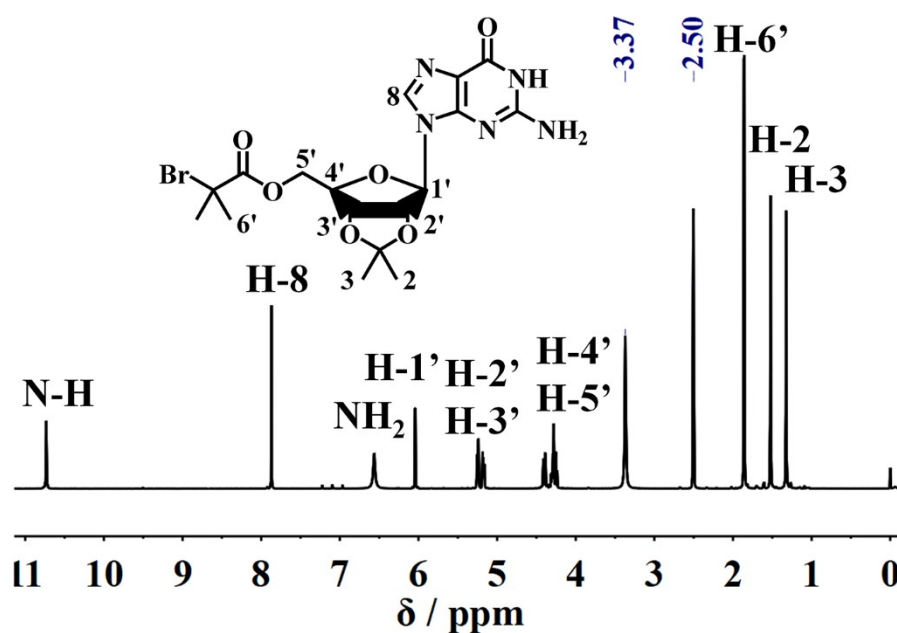

Figure S1. <sup>1</sup>H NMR spectrum of G-Br.

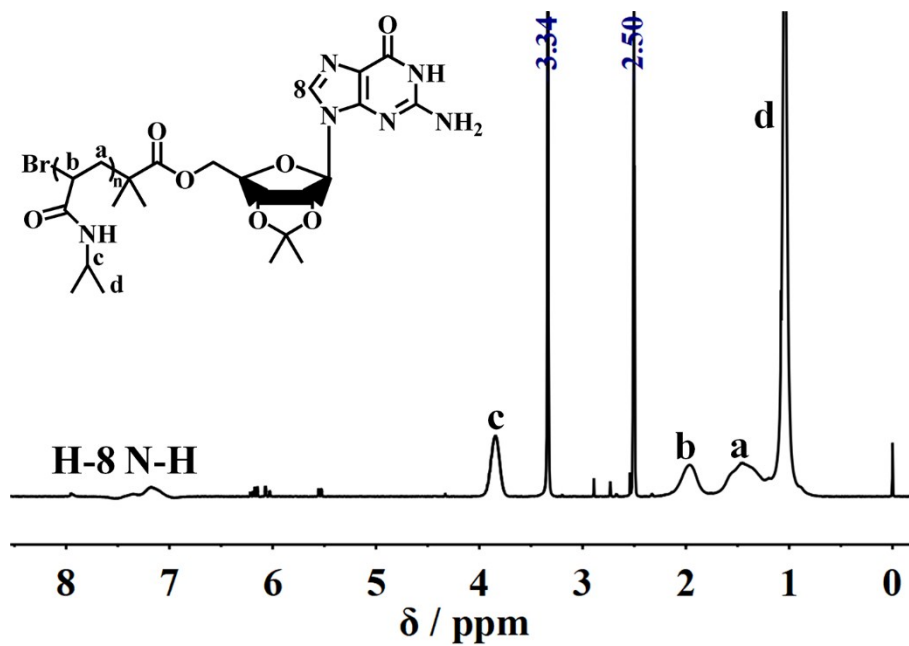

Figure S2. <sup>1</sup>H NMR spectrum of G-PNIPAM.

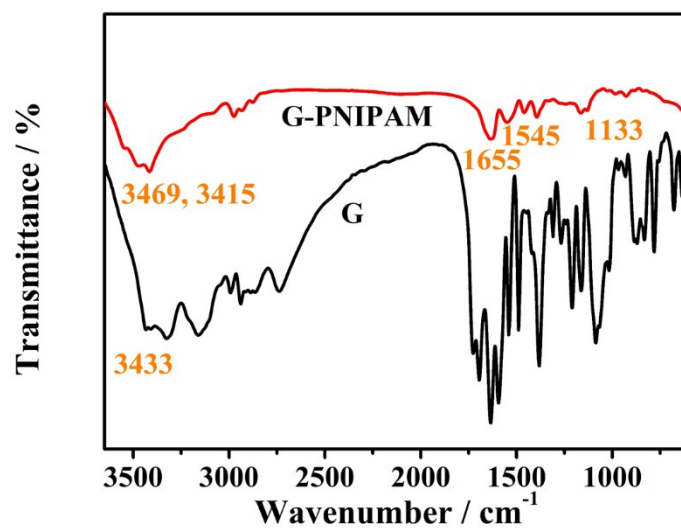

Figure S3. FT-IR spectra of G and G-PNIPAM.

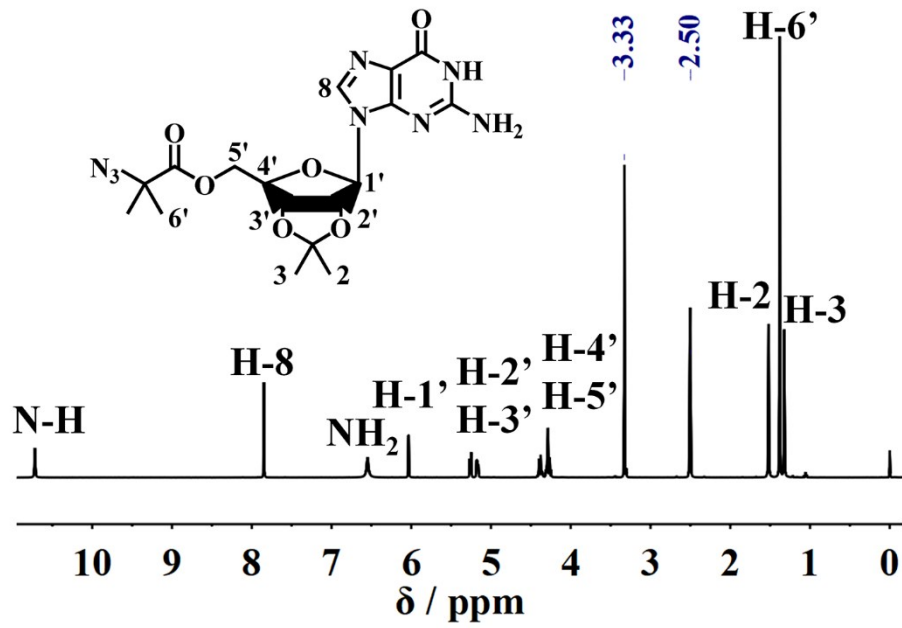

Figure S4.  $^1\text{H}$  NMR spectrum of G- $\text{N}_3$ .

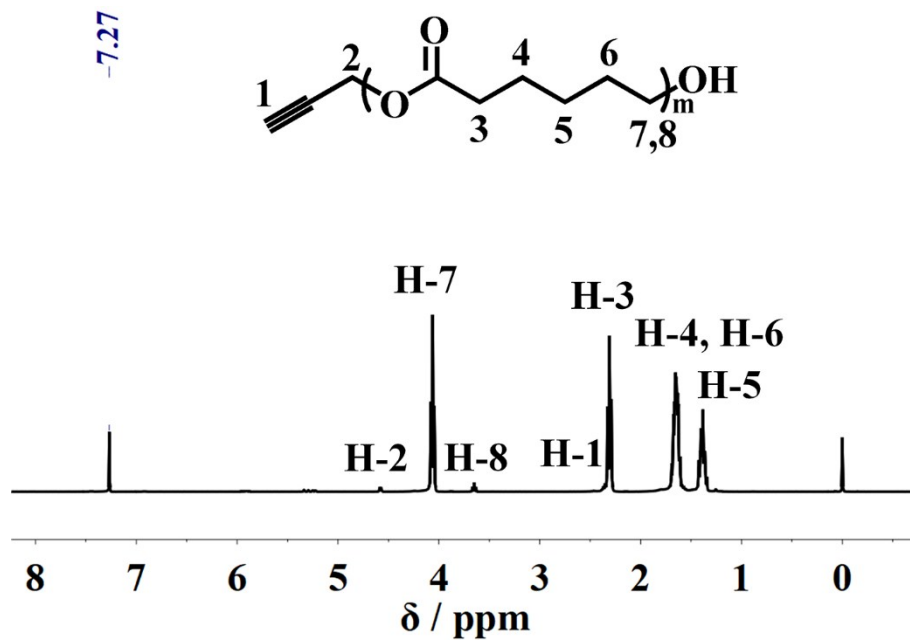

Figure S5.  $^1\text{H}$  NMR spectrum of PCL-alkyne.

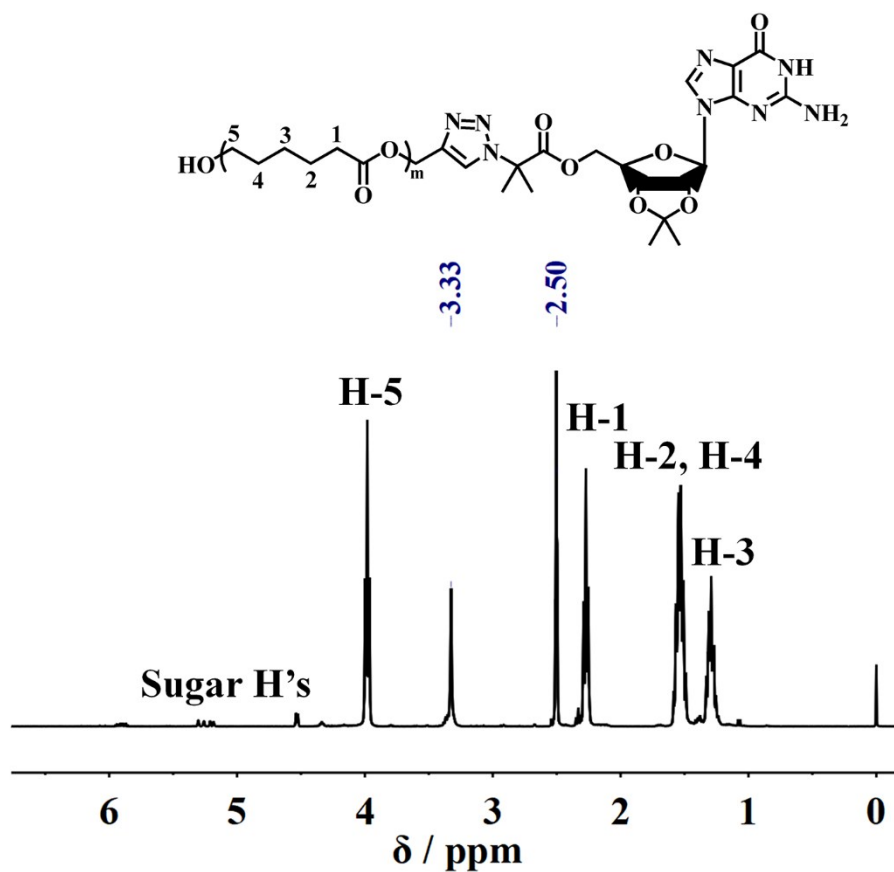

Figure S6.  $^1\text{H}$  NMR spectrum of G-PCL.

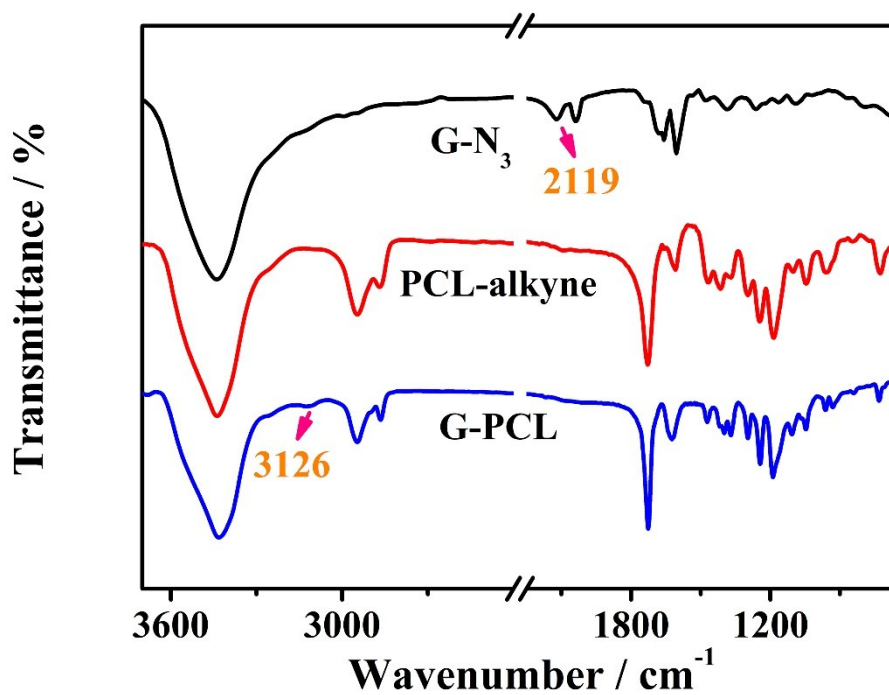

Figure S7. FT-IR spectra of G- $\text{N}_3$ , PCL-alkyne and G-PCL.

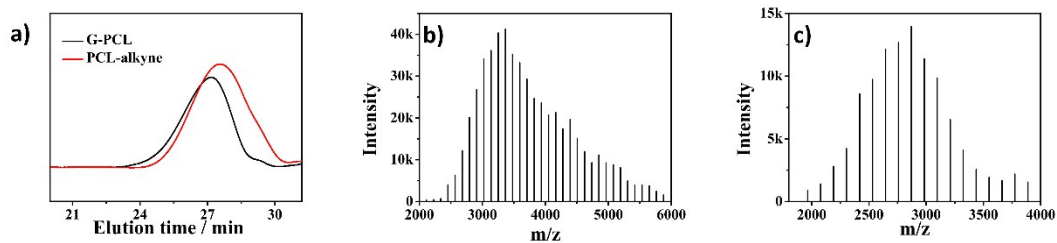

**Figure S8.** (a) SEC traces of G-PCL and PCL-alkyne using THF as the eluent. MALDI-TOF-MS traces of (b) G-PNIPAM and (c) G-PCL.

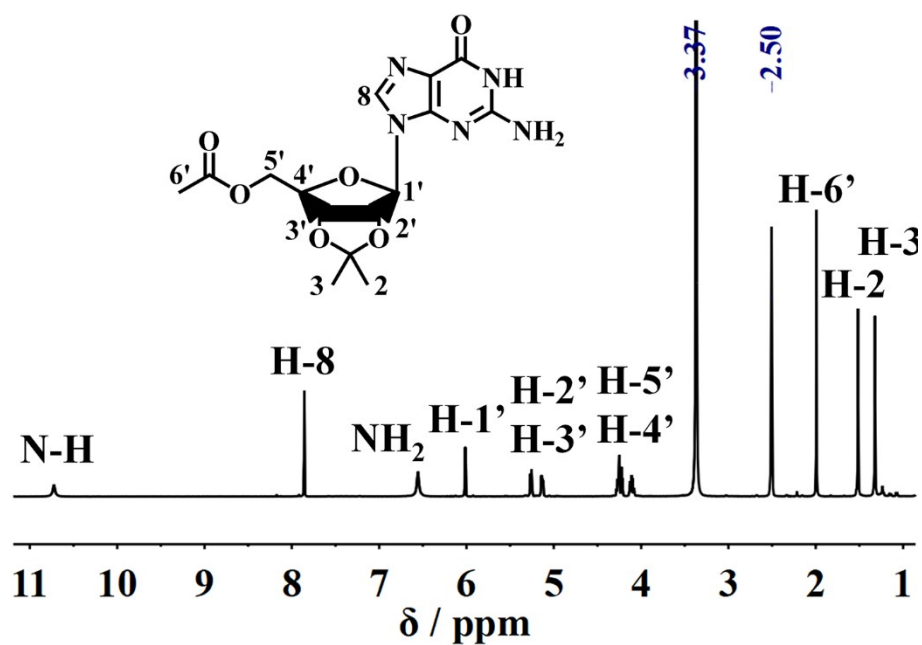

**Figure S9.** <sup>1</sup>H NMR spectrum of G-OAc.

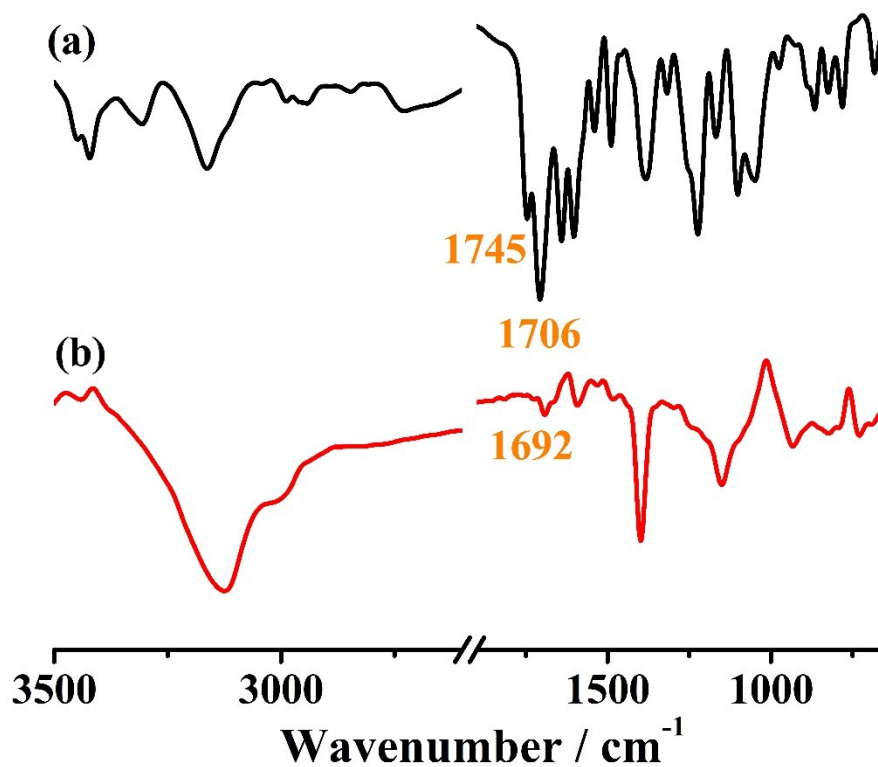

Figure S10. FT-IR spectra of G-OAc (a) in solid state and (b)  $\text{CHCl}_3$ .

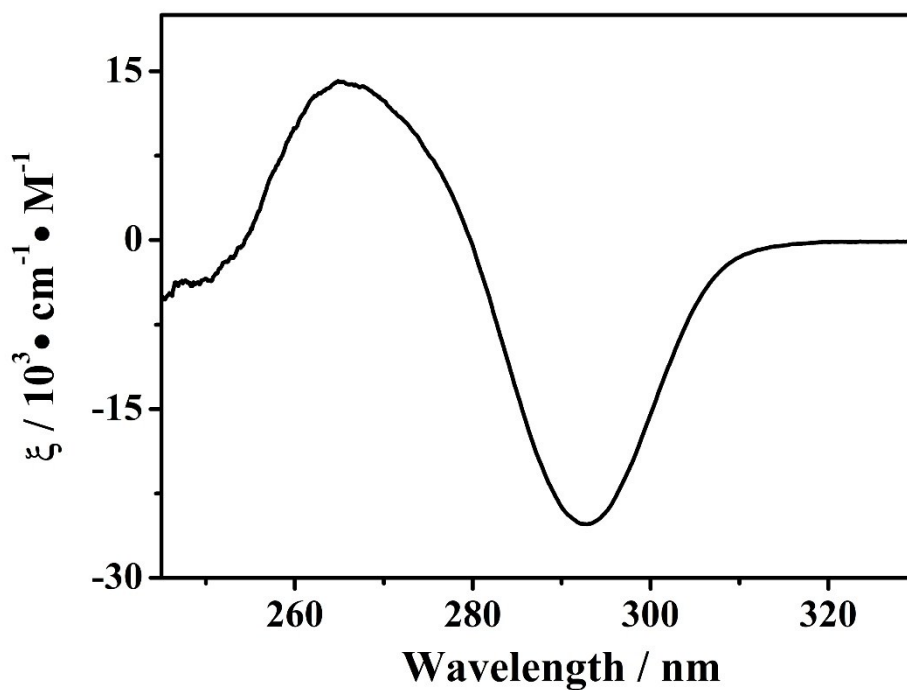

Figure S11. Circular dichroism (CD) spectrum of G-OAc at 0.04 mg/mL in  $\text{CHCl}_3$ .

**Table S1.** Theoretical and actual weight mixing ratios of G-PNIPAM versus G-PCL

| Sample | $m_{\text{G-PNIPAM}} : m_{\text{G-PCL}}^{\text{a}}$ | $m_{\text{G-PNIPAM}} : m_{\text{G-PCL}}^{\text{b}}$ |
|--------|-----------------------------------------------------|-----------------------------------------------------|
| P1     | 9.0:1.0                                             | 9.3:0.7                                             |
| P2     | 7.0:3.0                                             | 7.8:2.2                                             |
| P3     | 4.0:6.0                                             | 4.4:5.6                                             |

<sup>a</sup> Mixing weight ratios of G-PNIPAM versus G-PCL as designed.

<sup>b</sup> Mixing weight ratios of G-PNIPAM versus G-PCL that is determined by <sup>1</sup>H-NMR measurement after dialysis.

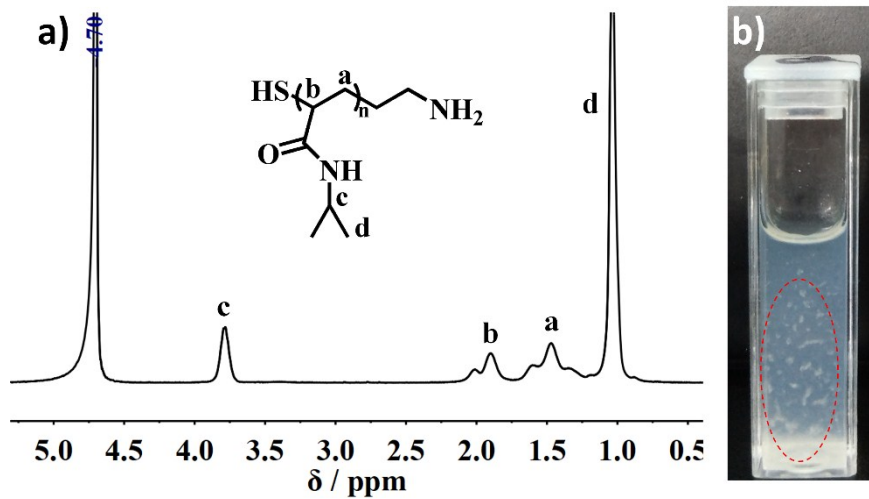

**Figure S12.** (a) <sup>1</sup>H NMR spectrum of PNIPAM-NH<sub>2</sub>, and (b) Digital photograph of the mixture solution containing PNIPAM-NH<sub>2</sub> and G-PCL (weight ratio: 7.0:3.0).

### Shape Evolutionary Mechanism of Self-Assembly in SAPs

As reported,<sup>10, 11</sup> the morphology of polymer assemblies or aggregates can be indicated by the hydrophilic-hydrophobic blocks ratio. Generally, the hydrophilic volume fraction ( $f$ ) parameter was used to reflect the change of SAPs to some extent. As equation (1)<sup>10, 11</sup>:

$$f = \frac{\sum V_{\text{philic}}}{\sum V_{\text{total}}} = \frac{\sum \frac{M_{\text{philic}}}{\rho_{\text{philic}}}}{\sum \frac{M_{\text{philic}}}{\rho_{\text{philic}}} + \sum \frac{M_{\text{phobic}}}{\rho_{\text{phobic}}}} \times 100\% \quad (1)$$

The  $M_i$  is different block molar mass in the total molecular weight of the block copolymer, and  $\rho_i$  is the density of different blocks, 1.269 g/cm<sup>3</sup> for PNIPAM,<sup>12</sup> and 1.130 g/cm<sup>3</sup> for PCL.<sup>13</sup> When  $f > 50\%$ , spherical micelles were expected to form, worm-like micelles when  $40\% < f < 50\%$ , vesicles or other lamellar structures for  $f < 40\%$ .<sup>10, 11</sup>

## Reference

- 1 A. Likhitsup, S. Yu, Y. H. Ng, C. L. L. Chai and E. K. W. Tam, *Chem. Commun.*, 2009, **27**, 4070.
- 2 Y. P. Kumar, R. N. Das, S. Kumar, O. M. Schütte, C. Steinem and J. Dash, *Chem. Eur. J.*, 2014, **20**, 3023.
- 3 J. C. Chen, M. Z. Liu, H. H. Gong, Y. J. Huang and C. Chen, *J. Phys. Chem. B*, 2011, **115**, 14947.
- 4 C. W. Tu, S. W. Kuo and F. C. Chang, *Polymer*, 2009, **50**, 2958.
- 5 J. C. Chen, M. Z. Liu, H. H. Gong, G. J. Cui, S. Y. Lu, C. M. Gao, F. Huang, T. T. Chen, X. Y. Zhang and Z. Liu, *Polym. Chem.*, 2013, **4**, 1815.
- 6 V. Darcos, S. El Habnoui, B. Nottelet, A. El Ghzaoui and J. Coudane, *Polym. Chem.*, 2010, **1**, 280.
- 7 M. A. Tasdelen, *Eur. Polym. J.*, 2011, **47**, 937.
- 8 T. Giorgi, F. Grepioni, I. Manet, P. Mariani, S. Masiero, E. Mezzina, S. Pieraccini, L. Saturni, G. P. Spada and G. Gottarelli, *Chem. Eur. J.*, 2002, **8**, 2143.
- 9 G. N. Reddy, A. Huqi, D. Iuga, S. Sakurai, A. Marsh, J. T. Davis, S. Masiero and S. P. Brown, *Chem. Eur. J.*, 2017, **23**, 2315.
- 10 Q. Yan and Y. Zhao, *Chem. Sci.*, 2015, **6**, 4343.
- 11 L. Chen, M. M. Xu, J. Hu and Q. Yan, *Macromolecules*, 2017, **50**, 4276.
- 12 L. Zhang, E. S. Daniels, V. L. Dimonie and A. Klein, *J. Appl. Polym. Sci.*, 2010, **118**, 2502.
- 13 V. Guarino, F. Causa, P. A. Netti, G. Ciapetti, S. Pagani, D. Martini, N. Baldini and L. Ambrosio, *J. Biomed. Mater. Res. B.*, 2008, **86**, 548.
